# Supplementary material for: Spatio-temporal patterns and trends of streamflow in water-scarce Mediterranean basins
Source: Copernicus journal article supplement (doi:10.5194/egusphere-2023-3007), 2024-01-03
Supplement: Supplementary file [file egusphere-2023-3007-AC1-supplement.zip]

## 1 Analysis of trends in model residuals

The model residuals (observed - simulated) were analysed for temporal trends which could be attributed to the influence of increasing forest cover or density on streamflow. During the period 2000-2018 there has been an increase in forested area from 46% to 56% (EEA, 2000, 2018), but our model only considers the 2018 forested area for the whole simulation period.

5 If the hypothesis that these land use changes are a main driver for streamflow reduction is true, the model would tend to underestimate flow at the beginning of the simulation, due to overestimating the extent of the forested area. Therefore, we would expect to observe a decreasing trend in model residuals.

We analysed the trends of the model residuals for the 50 gauging stations using linear regression models. The statistical significance of trends was assessed using a student's t-test. We also used the alternative hypothesis p-values ( $1 - \text{LR p-value}$ ) to classify the likelihood of each trend according to the recommendations issued by the IPCC (Mastrandrea et al., 2010): *virtually certain* ( $p > 0.99$ ), *very likely* ( $p > 0.90$ ), *likely* ( $p > 0.66$ ), *about as likely as not* ( $p > 0.33$ ), *very unlikely* ( $p > 0.10$ ), and *exceptionally unlikely* ( $p > 0.01$ ).

The metrics of the trends in the model residuals are summarised in Table S1, and Fig. S1 shows the spatial distribution of the trend slope. Figure S2 shows the plots of the residuals over time. Of the 50 gauging stations analysed, 70% have a significant trend ( $p\text{-value} < 0.05$ ). According to Mastrandrea et al. (2010), the likelihoods are: 62% *virtually certain*, 18% *very likely*, 6% *very likely*, 10% *about as likely as not*, 2% *unlikely*, and 2% *very unlikely*. However, half the trends are negative and half positive (51.4% and 48.6% respectively for the significant trends). We also must consider that  $R^2$  is very small for all trends, with a maximum of 0.098, although 82% of trends present values of  $R^2 < 0.01$ . Therefore, considering that only half the trends are negative and that  $R^2$  is very small for all trends, we can reasonably assume that land use changes in our study are not a main driver influencing streamflow.

**Table S1. Trends in the model residuals. Significant trends are marked in bold ( $p\text{-value} < 0.05$ ). LR: Linear Regression.**

| Gauging station                  | LR slope  | LR p-value      | $R^2$    | Likelihood        |
|----------------------------------|-----------|-----------------|----------|-------------------|
| Abrera                           | -7.43E-04 | <b>5.55E-04</b> | 3.21E-03 | virtually certain |
| Balsareny                        | 2.74E-04  | <b>3.49E-18</b> | 9.55E-03 | virtually certain |
| Berga                            | 2.25E-04  | <b>4.21E-07</b> | 4.91E-03 | virtually certain |
| Cardona                          | 2.00E-04  | <b>1.14E-17</b> | 1.08E-02 | virtually certain |
| Castellar de n'Hug               | 1.60E-05  | <b>2.71E-02</b> | 7.93E-04 | very likely       |
| Castellbell i el Vilar           | 5.04E-04  | <b>3.69E-16</b> | 8.31E-03 | virtually certain |
| Castellbisbal                    | 2.25E-04  | 1.93E-01        | 5.58E-04 | likely            |
| Castellet i la Gornal            | -1.26E-05 | <b>3.39E-03</b> | 2.08E-03 | virtually certain |
| El Papiol                        | 3.68E-05  | <b>4.20E-03</b> | 2.10E-03 | virtually certain |
| Esponellà                        | -3.20E-04 | <b>5.70E-12</b> | 6.00E-03 | virtually certain |
| Fogars de la Selva (Can Simó)    | -2.07E-04 | <b>1.64E-15</b> | 8.84E-03 | virtually certain |
| Fogars de la Selva (Pont Eiffel) | -1.05E-04 | <b>2.22E-05</b> | 2.42E-03 | virtually certain |

| Gauging station                  | LR slope  | LR p-value      | R <sup>2</sup> | Likelihood             |
|----------------------------------|-----------|-----------------|----------------|------------------------|
| Girona (Onyar)                   | -1.65E-06 | 9.35E-01        | 8.18E-07       | very unlikely          |
| Girona (Ter)                     | -1.10E-04 | 3.96E-01        | 9.36E-05       | about as likely as not |
| Guardiola de Berguedà            | 1.42E-04  | <b>1.96E-07</b> | 3.47E-03       | virtually certain      |
| Guixers (Aigua de Valls)         | 8.39E-04  | <b>7.85E-23</b> | 2.19E-02       | virtually certain      |
| Guixers (Cardener - Monegal)     | -7.24E-04 | <b>1.38E-34</b> | 9.80E-02       | virtually certain      |
| Jorba                            | -1.08E-05 | 6.43E-02        | 9.39E-04       | very likely            |
| La Cellera de Ter                | 2.24E-04  | 1.35E-01        | 3.39E-04       | likely                 |
| La Coma i la Pedra               | -2.33E-04 | <b>2.05E-11</b> | 1.73E-02       | virtually certain      |
| La Garriga                       | 3.55E-05  | <b>6.73E-09</b> | 4.19E-03       | virtually certain      |
| La Pobla de Claramunt            | -2.85E-05 | <b>4.83E-09</b> | 8.48E-03       | virtually certain      |
| Les Masies de Roda (Ter i Gurri) | 3.38E-04  | <b>1.42E-05</b> | 2.95E-03       | virtually certain      |
| Les Masies de Roda (Ter)         | -4.37E-04 | <b>4.90E-02</b> | 1.26E-03       | very likely            |
| Martorell                        | -9.67E-06 | 8.40E-01        | 9.89E-06       | unlikely               |
| Montornès del Vallès             | -1.25E-05 | <b>9.17E-03</b> | 9.57E-04       | virtually certain      |
| Montseny                         | -3.41E-06 | 6.52E-01        | 3.57E-05       | about as likely as not |
| Navès                            | 1.98E-05  | 7.38E-02        | 6.49E-04       | very likely            |
| Olot                             | -7.09E-05 | <b>1.27E-14</b> | 7.67E-03       | virtually certain      |
| Puig-reig                        | 2.04E-05  | 1.76E-01        | 4.04E-04       | likely                 |
| Ripoll                           | 9.11E-05  | 6.15E-02        | 4.35E-04       | very likely            |
| Riudellots de la Selva           | -1.91E-04 | <b>2.43E-34</b> | 2.40E-02       | virtually certain      |
| Sallent                          | 3.81E-05  | <b>4.14E-11</b> | 6.75E-03       | virtually certain      |
| Sant Celoni                      | -2.90E-06 | 6.22E-01        | 3.08E-05       | about as likely as not |
| Sant Feliu de Buixalleu          | 4.65E-05  | <b>7.89E-03</b> | 1.91E-03       | virtually certain      |
| Sant Gregori                     | -4.30E-05 | <b>3.03E-05</b> | 3.13E-03       | virtually certain      |
| Sant Joan de les Abadesses       | 5.34E-05  | <b>2.58E-02</b> | 6.28E-04       | very likely            |
| Sant Joan Despí                  | 5.75E-04  | <b>9.37E-08</b> | 3.73E-03       | virtually certain      |
| Sant Sadurní d'Anoia             | 2.43E-05  | 9.73E-02        | 3.54E-04       | very likely            |
| Sant Vicenç dels Horts           | 1.56E-03  | <b>7.14E-20</b> | 1.38E-02       | virtually certain      |
| Santa Coloma de Gramenet         | -1.17E-04 | <b>5.37E-06</b> | 2.84E-03       | virtually certain      |
| Santa Cristina d'Aro             | 3.14E-06  | 8.01E-02        | 5.22E-04       | very likely            |
| Santa Perpètua de Mogoda         | -1.04E-04 | <b>1.10E-24</b> | 2.79E-02       | virtually certain      |
| Serra de Daró                    | -8.87E-05 | <b>7.51E-03</b> | 1.09E-03       | virtually certain      |
| Torelló                          | 1.21E-04  | <b>2.92E-02</b> | 1.62E-03       | very likely            |
| Torroella de Montgrí             | -4.62E-04 | <b>9.68E-03</b> | 8.90E-04       | virtually certain      |
| Tortellà                         | -3.08E-04 | <b>1.94E-06</b> | 1.05E-02       | virtually certain      |
| Vilada (Merdañol)                | -3.75E-06 | 4.59E-01        | 2.02E-04       | about as likely as not |
| Vilada (Riera Vilada)            | 2.36E-05  | 4.87E-01        | 1.41E-04       | about as likely as not |
| Vilanova de Sau                  | 1.00E-03  | <b>9.33E-13</b> | 5.01E-02       | virtually certain      |

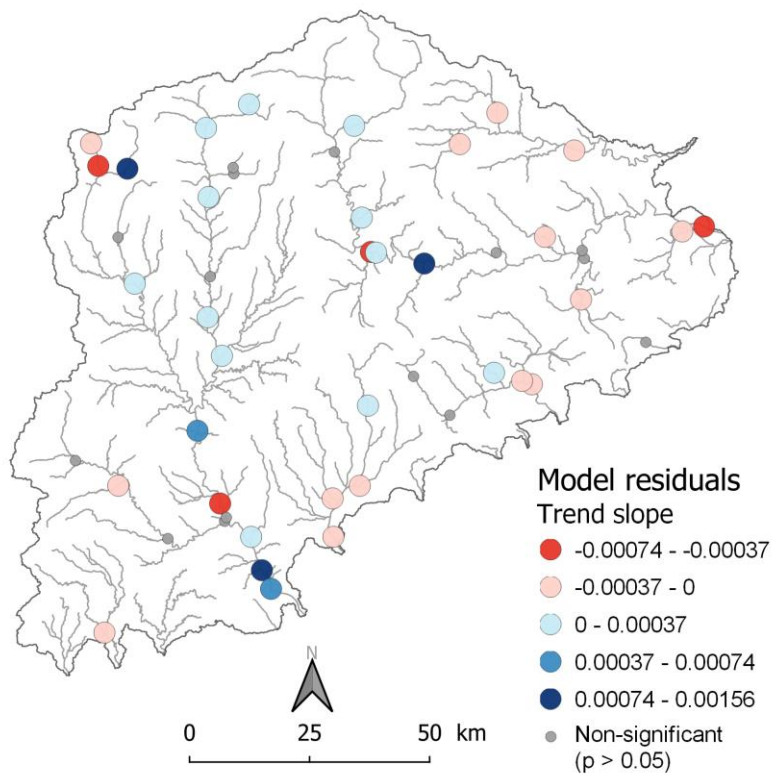

**Figure S1: Spatial distribution trend slope for model residuals.**

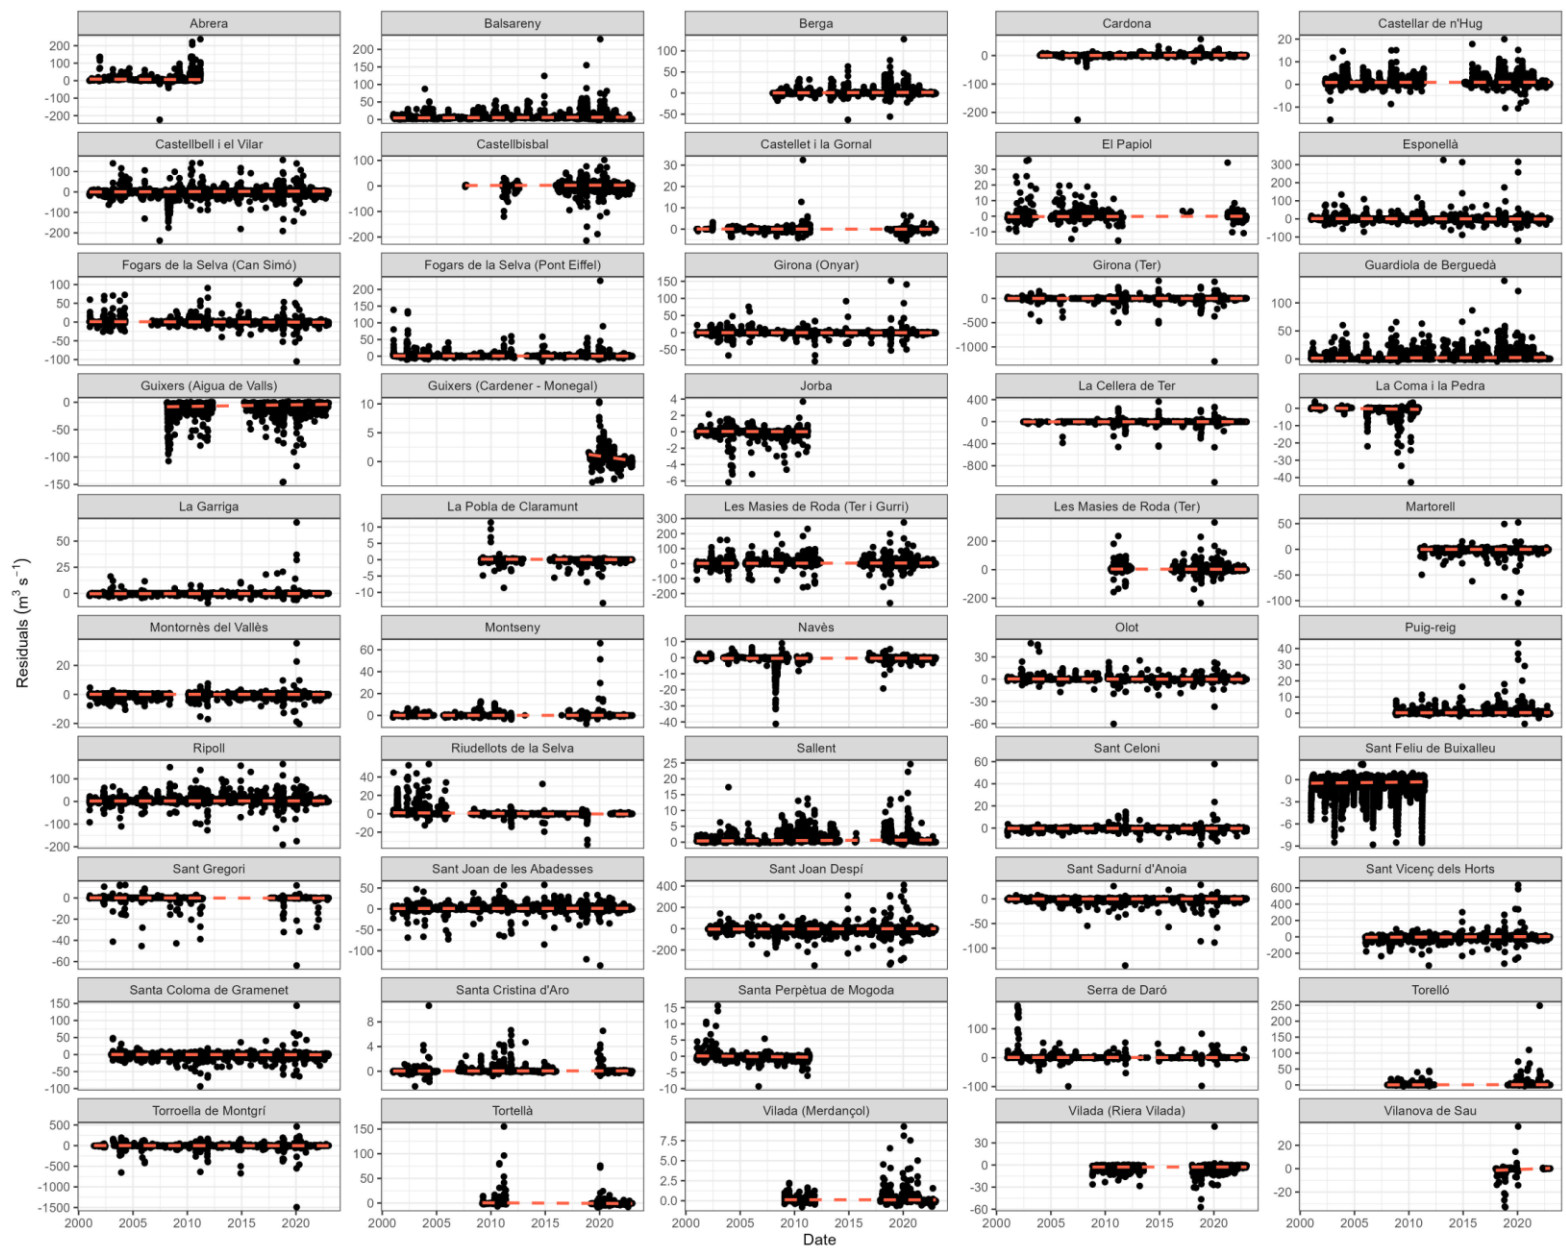

Figure S2: Plots of model residuals over time for each of the 50 gauging stations.

2 Uncertainty of simulated streamflow

30 We quantified the uncertainty associated with the simulated streamflow with 95PPU bands (Abbaspour et al., 2015, 2018). These bands are calculated at the 2.5% and 97.5% levels of the cumulative distribution of simulated streamflow obtained through Latin hypercube sampling, and their goodness of fit is assessed by the metrics “P-factor” and “R-factor”. The P-factor, varying from 0 to 1, is the fraction of observed data bracketed by the 95PPU band, and the R-factor is the ratio of the average width of the 95PPU band and the standard deviation of the observed data. For assessing discharge, it is recommended that the P-factor and R-factor are respectively  $> 0.7$  and  $< 1.5$ , although smaller P-factors might be considered acceptable depending on the scale of the project (Abbaspour et al., 2015).

Table S2 lists the R-factor and P-factor for the six gauging stations shown in Fig. 2., and Figs. S3-S8 show the observed streamflow, the (best) simulated streamflow and the 95PPU bands for each gauging station respectively.

The R-factor for all gauging stations is below the recommended value, but the P-factor for some gauging stations does not reach the recommended 0.7. Nevertheless, Abbaspour et al. (2015) reports gauging stations with P-factor as low as 0.39 as accurate, and taking into account satisfactory R-factor and KGE values, we consider this uncertainty acceptable.

Table S2. R-factor and P-factor of the 95PPU bands.

| Gauging station          | Basin     | P-factor | R-factor |
|--------------------------|-----------|----------|----------|
| Castellet i la Gornal    | Foix      | 0.66     | 0.42     |
| Esponellà                | Fluvià    | 0.56     | 0.38     |
| Fogars de la Selva       | Tordera   | 0.76     | 0.46     |
| Les Masies de Roda       | Ter       | 0.40     | 0.57     |
| Sant Joan Despí          | Llobregat | 0.73     | 0.66     |
| Santa Coloma de Gramenet | Besòs     | 0.85     | 0.83     |

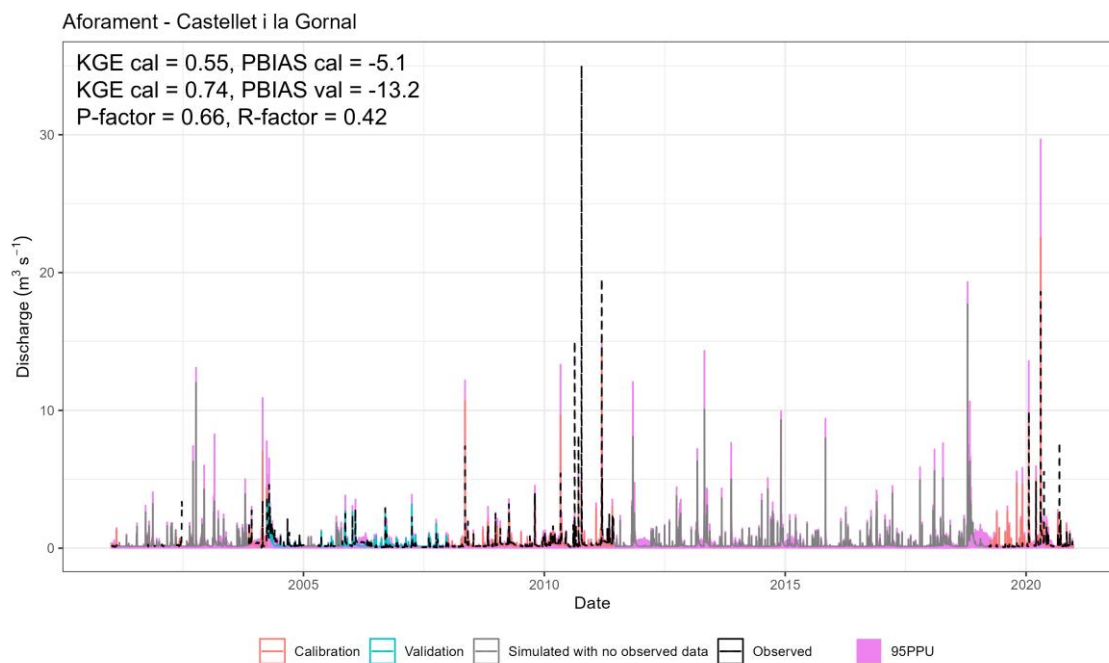

45 **Figure S3: Observed and simulated daily streamflow, and the 95PPU band for the gauging station in Castellet i la Gornal, in the Foix basin. KGE and PBIAS values for both the calibration and validation periods and the R-factor and P-factor are shown.**

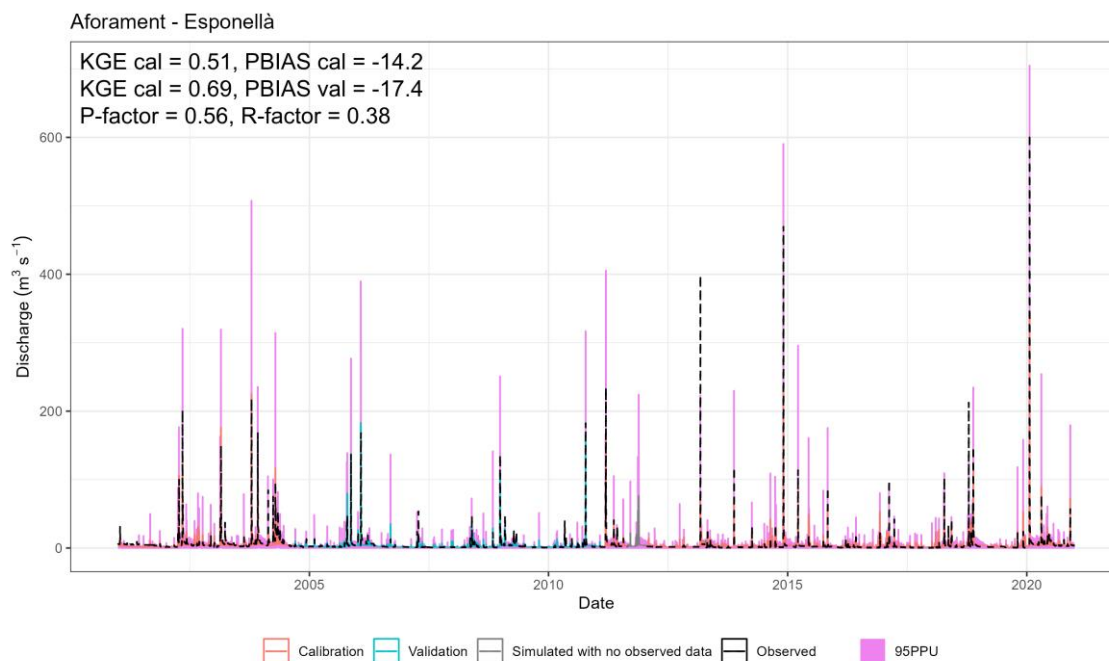

**Figure S4: Observed and simulated daily streamflow, and the 95PPU band for the gauging station in Esponellà, in the Fluvà basin. KGE and PBIAS values for both the calibration and validation periods and the R-factor and P-factor are shown.**

Aforament - Fogars de la Selva (Can Simó)

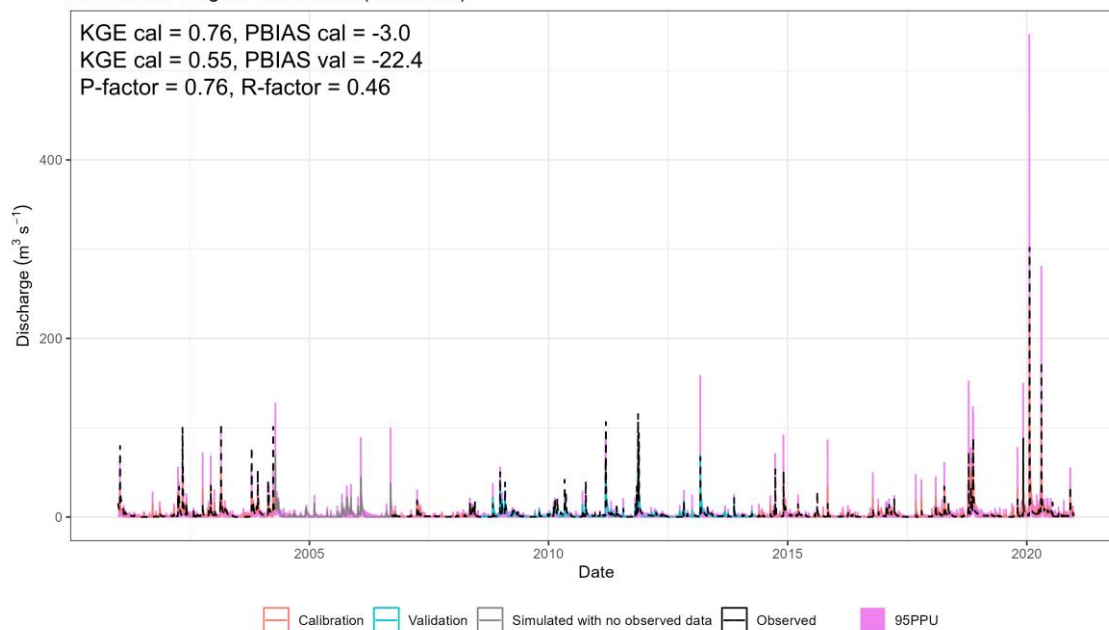

50

**Figure S5: Observed and simulated daily streamflow, and the 95PPU band for the gauging station in Fogars de la Selva, in the Tordera basin. KGE and PBIAS values for both the calibration and validation periods and the R-factor and P-factor are shown.**

Aforament - les Masies de Roda (Ter i Gurri)

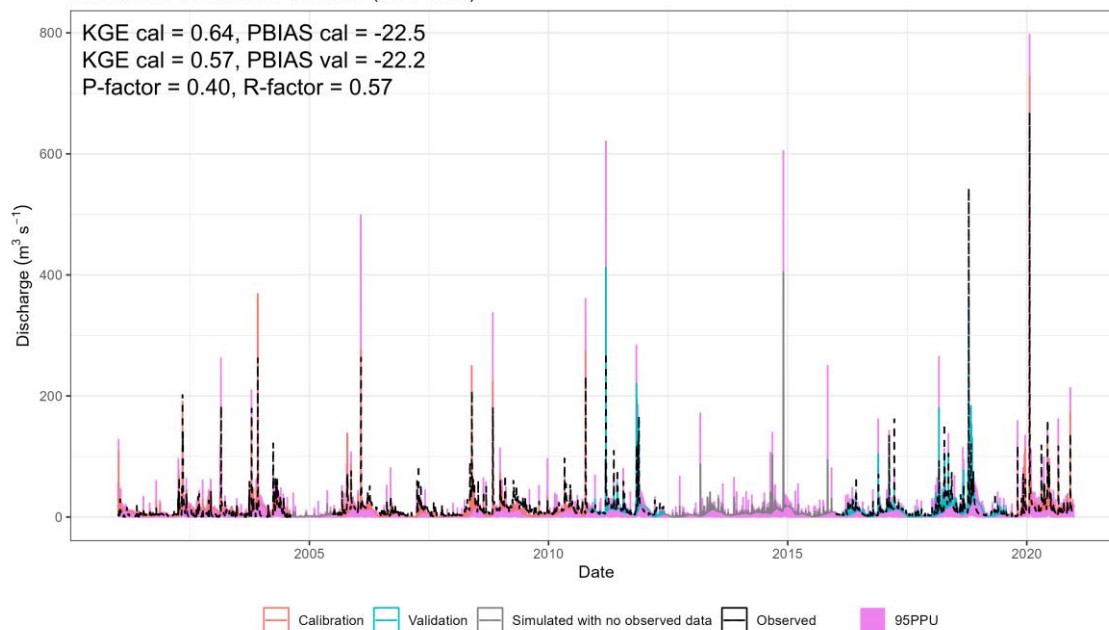

55

**Figure S6: Observed and simulated daily streamflow, and the 95PPU band for the gauging station in Les Masies de Roda, in the Ter basin. KGE and PBIAS values for both the calibration and validation periods and the R-factor and P-factor are shown.**

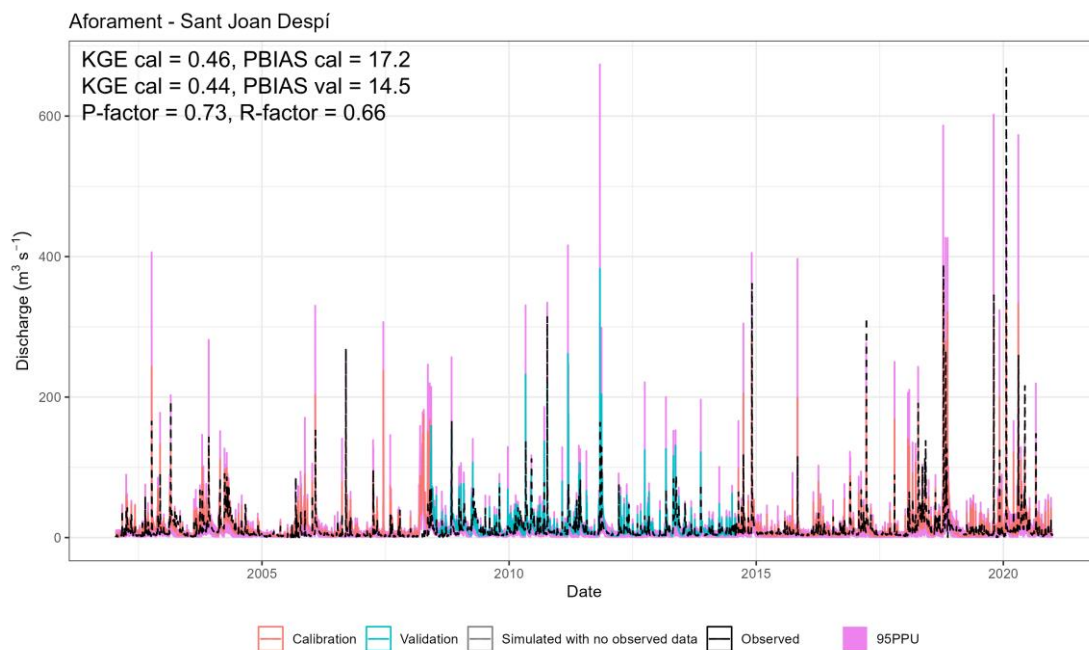

**Figure S7: Observed and simulated daily streamflow, and the 95PPU band for the gauging station in Sant Joan Despí, in the Llobregat basin. KGE and PBIAS values for both the calibration and validation periods and the R-factor and P-factor are shown.**

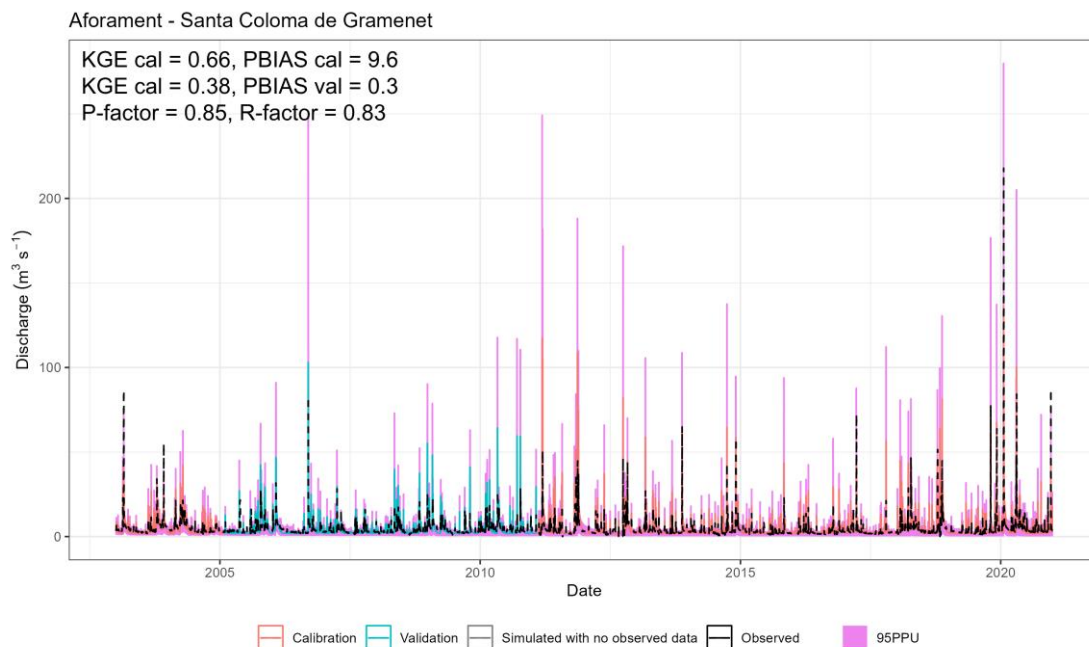

**60 Figure S8: Observed and simulated daily streamflow, and the 95PPU band for the gauging station in Santa Coloma de Gramenet, in the Besòs basin. KGE and PBIAS values for both the calibration and validation periods and the R-factor and P-factor are shown.**



3 Comparison of observed and simulated trends

Using simulated streamflow to calculate hydrological indicators and then identifying their trends provides us with comprehensive results in both time and space, as opposed to only using observation data, which allows us to only identify trends at specific locations and gaps in the record hinder the analysis.

Nevertheless, we compared the observed and the simulated trends at four of the gauging stations with the most complete record of all CRBD. Missing data, especially when it consists of several contiguous days, may compromise the calculation of some indicators, and thus the analysis of trends. However, we are able to calculate all indicators for the four gauging stations by omitting missing data.

Figure S13 shows the observed and simulated Sen’s slopes of each of the 40 hydrological indicators for each gauging station, while Figure S14 shows only the indicators for which both the observed and simulated trend is significant (Mann-Kendall, p-value < 0.05). While some of the significant pairs present different directions of trend, the majority are in the same direction. Therefore, while we might not capture all the significant trends present in the observations, we can confirm that using simulated streamflow to fill the spatial and temporal gaps in the observed record allows us to better identify and characterize spatio-temporal trends. Moreover, the fact that streamflow was first calibrated ensures overall the validity of the analysis.

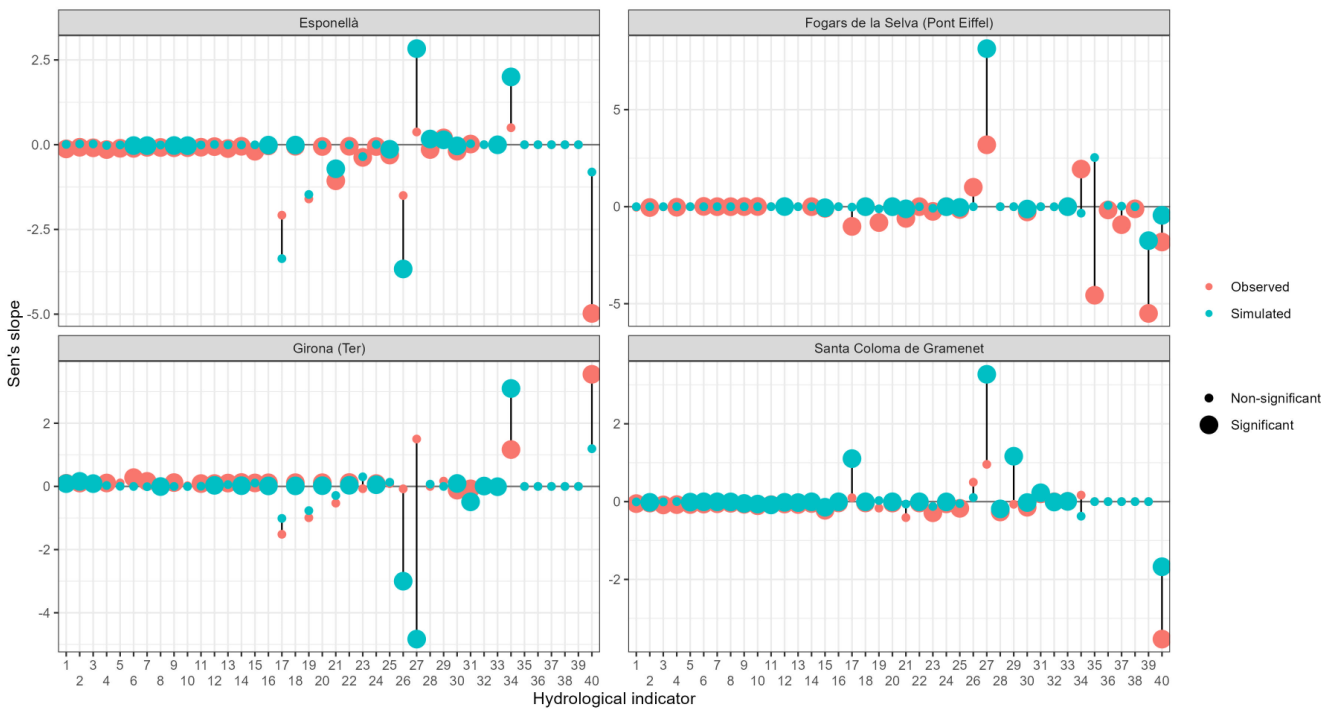

Figure S9: Sen’s slope of observed and simulated trends. See Table S3 to match each indicator to the number used in the figure.

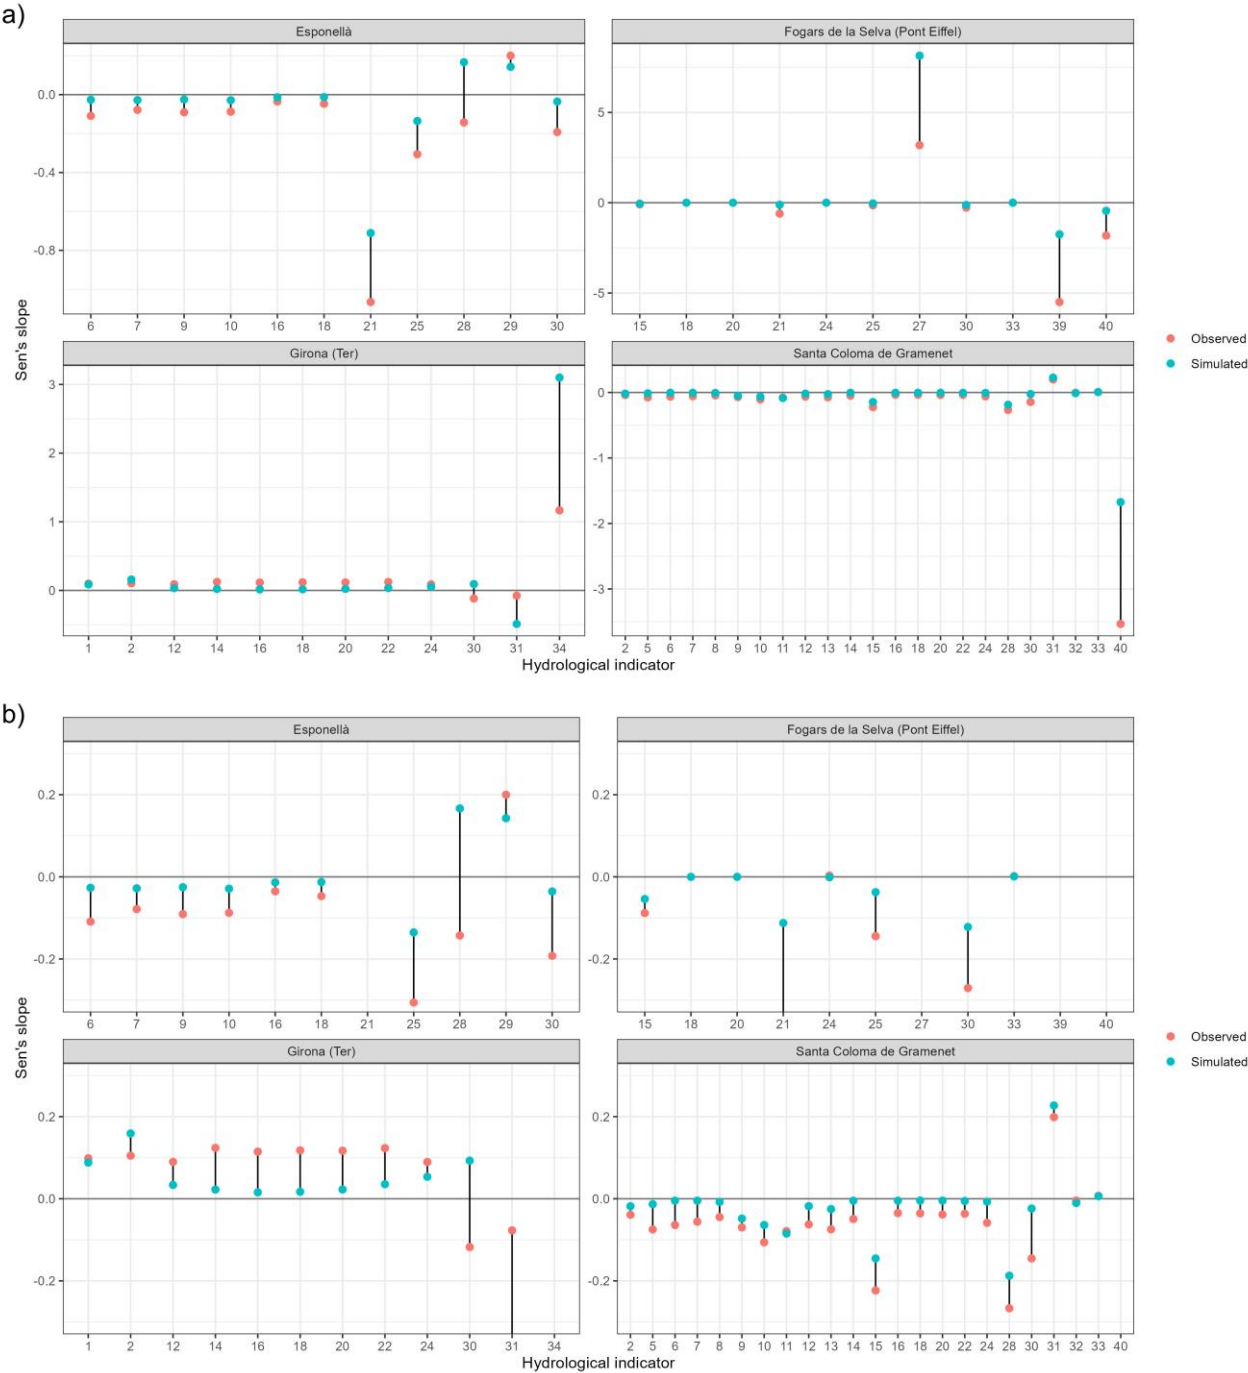

**Figure S10: Sen's slope of significant observed and simulated trends. See Table S3 to match each indicator to the number used in the figure. a) Default values for y-axis. b) Detail for y-axis to better distinguish Sen's slope closer de 0.**

**Table S3. Hydrological indicators and their labels used in Figs. S3 and S4.**

| Figure label | Hydrological indicator               | Figure label | Hydrological indicator              |
|--------------|--------------------------------------|--------------|-------------------------------------|
| 1            | Median of daily flow in January      | 21           | 7-day means of maximum daily flow   |
| 2            | Median of daily flow in February     | 22           | 30-day means of minimum daily flow  |
| 3            | Median of daily flow in March        | 23           | 30-day means of maximum daily flow  |
| 4            | Median of daily flow in April        | 24           | 90-day means of minimum daily flow  |
| 5            | Median of daily flow in May          | 25           | 90-day means of maximum daily flow  |
| 6            | Median of daily flow in June         | 26           | Julian date of minimum daily flow   |
| 7            | Median of daily flow in July         | 27           | Julian date of maximum daily flow   |
| 8            | Median of daily flow in August       | 28           | Number of high pulses               |
| 9            | Median of daily flow in September    | 29           | Number of low pulses                |
| 10           | Median of daily flow in October      | 30           | Mean duration of high pulses        |
| 11           | Median of daily flow in November     | 31           | Mean duration of low pulses         |
| 12           | Median of daily flow in December     | 32           | Rise rate                           |
| 13           | Median of annual daily flow          | 33           | Fall rate                           |
| 14           | 10th percentile of annual daily flow | 34           | Number of flow reversals            |
| 15           | 90th percentile of annual daily flow | 35           | Total number of days with zero-flow |
| 16           | Annual minimum daily flow            | 36           | Frequency of zero-flow events       |
| 17           | Annual maximum daily flow            | 37           | Mean duration of zero-flow events   |
| 18           | 3-day means of minimum daily flow    | 38           | jday of first zero-flow event       |
| 19           | 3-day means of maximum daily flow    | 39           | Median jday of zero-flow events     |
| 20           | 7-day means of minimum daily flow    | 40           | Sum of all annual flow              |

## References

- Abbaspour, K., Rouholahnejad, E., Vaghefi, S., Srinivasan, R., Yang, H., and Kløve, B.: A continental-scale hydrology and water quality model for Europe: Calibration and uncertainty of a high-resolution large-scale SWAT model, *J. Hydrol.*, 524, 733–752, <https://doi.org/10.1016/J.JHYDROL.2015.03.027>, 2015.
- 90 Abbaspour, K., Vaghefi, S. A., and Srinivasan, R.: A Guideline for Successful Calibration and Uncertainty Analysis for Soil and Water Assessment: A Review of Papers from the 2016 International SWAT Conference, *Water*, 10, 6, <https://doi.org/10.3390/W10010006>, 2018.
- European Environment Agency (EEA): Corine Land Cover (CLC) 2000, Version 2020\_20u1, <https://land.copernicus.eu/pan-european/corine-land-cover/clc-2000>, 2000.
- 95 European Environment Agency (EEA): Corine Land Cover (CLC) 2018, Version 2020\_20u1, <https://land.copernicus.eu/pan-european/corine-land-cover/clc2018>, 2018.
- Mastrandrea, M. D., Field, C. B., Stocker, T. F., Edenhofer, O., Ebi, K. L., Frame, D. J., Held, H., Kriegler, E., Mach, K. J., Matschoss, P. R., Plattner, G.-K., Yohe, G. W., and Zwiers, F. W.: Guidance Note for Lead Authors of the IPCC Fifth Assessment Report on Consistent Treatment of Uncertainties, 2010.
