# Supplementary material for: Spatio-temporal patterns and trends of streamflow in water-scarce Mediterranean basins
Source: Copernicus journal article supplement (doi:10.5194/egusphere-2023-3007), 2024-01-03
Supplement: Supplementary file [file egusphere-2023-3007-AC2-supplement.zip]

## Reviewer 2

The spatio-temporal analysis of streamflow patterns and trends over the last 20 years in Spanish Catalonia proposed in the article is, in my opinion, useful and interesting.

A large number of measurements are included in the article, and a major modeling effort is made to generate flow series that are continuous in space and time from data that are mostly discontinuous (which is always more or less the case everywhere). The analysis of patterns and trends involves numerous indicators of different flow characteristics (magnitude, duration, frequency). This makes for interesting and original results.

**Response: Thank you! Your feedback has been greatly valuable in order to improve this manuscript. We have carefully read your comments and done our best to properly address them.**

The authors state 3 objectives for their study:

1. Develop a useful modeling tool for water management
2. Propose a new calibration strategy that overcomes conventional approaches
3. Characterize spatio-temporal patterns and trends of streamflow.

In my opinion, the demonstration made in the article for the first 2 objectives is not completely satisfactory.

**Response: Thank you for your comment. We agree with the reviewer's opinion that we should prioritise the third objective, as the other two are secondary objectives/features of the methodology. We have restructured the Introduction to clarify that.**

**On the first objective**, the authors mention in section 2 "Co-development with end-users".

The "end-users" are not clearly defined (what type of structure do they belong to? how many are there? how were they chosen? did some refuse to participate? what was their level of appropriation of hydrological sciences and modeling?)

**Response: We have clarified who the intended "end-users" of our model are and their role in model development.**

### Lines 137-144:

"In order to familiarize end-users (i.e., water managers from the Catalan Water Agency, the governing body of the CRBD) with the hydrological model and promote its use as a tool to support decision making in the CRBD, we have actively involved them in the development of the SWAT+ model from conceptualization to application. The main role of end-users in model development has been to procure data, including weather, streamflow, point source discharges, and, more notably, expert knowledge on actual management practices. This expert knowledge includes real reservoir release operations, which were adapted into custom-built decision tables, as well as irrigation practices, inter-

basin water transfers, and urban abstractions. The integration of management practices results in a more accurate hydrological model with the potential use of testing different management scenarios, and thus support better informed decision making.”

The authors indicate that they aim to help end-users understand how the model works, through training sessions. No details are given on the number of these sessions, their content or the end-users' prerequisites. No feedback is offered or analyzed on this appropriation phase (were there any evaluations following the training sessions? how did the end-users progress? what mastery levels were reached?).

Response: Unfortunately, some of the meetings to discuss model development and the SWAT+ training sessions were informal meetings, and so we did not keep a full record. Also, there was no formal evaluation of the training sessions, as they were solely treated as workshops where the SWAT+ model was built so the end-users could familiarize themselves with the model's interface and outputs.

The authors insist on "the inclusion of valuable expert knowledge on actual management practices". Is this to be understood as co-development of the model? Or rather as consultation to parameterize the water use rules of the reservoirs (in the same way as soil experts would have been consulted to parameterize soil properties in the model)?

In my opinion, the full description of the methods and the retrospective analysis are insufficient for this issue to be presented as an objective of the article. It would seem more appropriate to treat this point as a step in the parametrization of the model, based on expert data from the field. The authors' view of their collaboration with stakeholders could be discussed in the article, but as it stands, I don't consider that there is a clear demonstration of co-construction (what would have been the results of the modelling without this consultation on water use rules?).

Response: As per a previous comment, we have already restructured the Introduction to give greater weight to the main objective of this article. However, we do consider the involvement of end-users/water managers as co-development rather than simply consultation, as they have provided numerous data and participated in discussions on how to better incorporate it into the model. In fact, one of the co-authors is a representative of the end-users involved in the model development.

With regard to the **second objective**, the proposed calibration/validation technique is interesting, but raises a number of unresolved questions.

In my opinion, the authors give this technique an exaggerated benefit in relation to the results shown in the article. Does this technique really provide better results than a traditional calibration/validation technique? It's quite possible, but it's not demonstrated in the article. In my opinion, it would require an article of its own to demonstrate this. This technique could simply be presented in the "materials and methods" section. Its positive aspects and limitations could be discussed. But positioning it as an objective of

the article seems too strong, as do the claims that it best captures the spatio-temporal variability of hydrological processes in the study area.

Response: Thank you for this comment. We agree that the benefits of the calibration/validation strategy presented here are not quantified. In fact, for a time we considered working on a separate article where different calibration/validation strategies, including the one presented in this article, were tested. Unfortunately, the main researcher working on this exercise left the project before it could be completed. Nevertheless, we do believe our strategy has a sound basis and represents an improvement to conventional techniques. As per previous comments, we have already restructured the objectives, focusing on what was originally the third one and mentioning the other two more as secondary objectives. However, we do believe it is appropriate to introduce this topic in the Introduction rather than exclusively presenting it in the “Materials and methods” section.

Another point concerns the fact that only one land use is considered over the entire period, even though it may have varied, as the authors indicate. Would it have been more appropriate to calibrate the model on the flows of the period when this land use was in place? rather than calibrating on random periods?

Response: Thank you for your comment. Only calibrating the model using the flows from when the final land use was in place would result in a significant reduction of available data, which would in turn compromise the calibration/validation strategy. However, as a result of the first reviewer’s comments, we have further addressed the implications of not taking the land use change into account, as well as justified our decision in section 1 of the Supplement.

Lines 168-171:

“It should be noted that only a static rather than dynamic land use map is considered in this study, and thus we are omitting the effect that changes in land use during the simulation period may have on streamflow, under the assumption that climate and not land use change is the main driver of the hydrological response. To verify this hypothesis, we performed an analysis of the trends in the model residuals (section 1 of the Supplement).”

Lines 361-369:

“Another consideration on model inputs is the fact that land use change during the simulation period is not considered in our study, due to having determined that land use change and in particular afforestation is not a main driver of hydrological response for the scope of this study (section 1 of the Supplement). However, it can still be an important factor at the local scale, and its consideration represents an opportunity for future management practices. Forest cover can be managed to reduce “green water” (i.e., water stored in the soil and vegetation and that is then consumed) and turn it into “blue water” (i.e., runoff), increasing water availability in potential areas suffering from water scarcity. Garcia et al. (2024) used the SWAT+ CRBD model to assess the effect of forest thinning

on water yield, and results highlighted the potential of forest management to enhance “blue water” availability.”

Lines 436-442:

“However, under the assumption that climate variability and not afforestation is the main driver of streamflow reduction (Buendia et al., 2016), we did not account for these land use changes in the model, and we used the forested area in 2018 for the whole simulation period. The analysis of trends in model residuals (see section 1 of the Supplement) does not evidence the presence of a factor other than the ones already included in the model affecting the hydrological response, and thus justifies the exclusion of land use changes in our study. However, it must be noted that despite not accounting for land use changes per se, we do account for the increase in evapotranspiration due to increased temperatures.”

On **the third objective**, the trend analyses are really interesting and raise several questions as to their interpretation.

Trends and patterns are based on model simulations. Calibration/validation performance is uneven between periods and between basins. I think it would be useful to associate a level of confidence with the indicators produced, depending on the quality of the modeling. This would allow us to temper the conclusions regarding patterns and trends.

Response: Thank you for your comment. We have included the quantification of the uncertainty associated to simulated streamflow in section 2 of the Supplement.

We also separated Fig. 3 into two figures, and for Fig. 4 (Annual Flow) we added the distribution of non-standardized Sen’s slope and of the standard deviation.

Lines 241-243:

“We also assessed the 95PPU uncertainty bands and their metrics P-factor and R-factor (Abbaspour et al., 2015, 2018) for representative gauging stations of each main basin (see section 2 of the Supplement).”

Lines 272-274:

“The comparisons between observed and simulated daily streamflow for representative gauging stations of the main rivers of the CRBD demonstrate good model performance (Fig. 2, see section 2 of the Supplement to visualize the uncertainty represented by 95PPU bands).”

Lines 297-299:

“We don’t observe a specific spatial pattern on the distribution of the Sen’s slope standard deviation for total annual flow (Fig. 4c), except for the few significant trends in the Tordera basin, where the standard deviation is generally high, so overall we can conclude that the uncertainty in Sen’s slopes for all CRBD is similar.”

Figure 4:

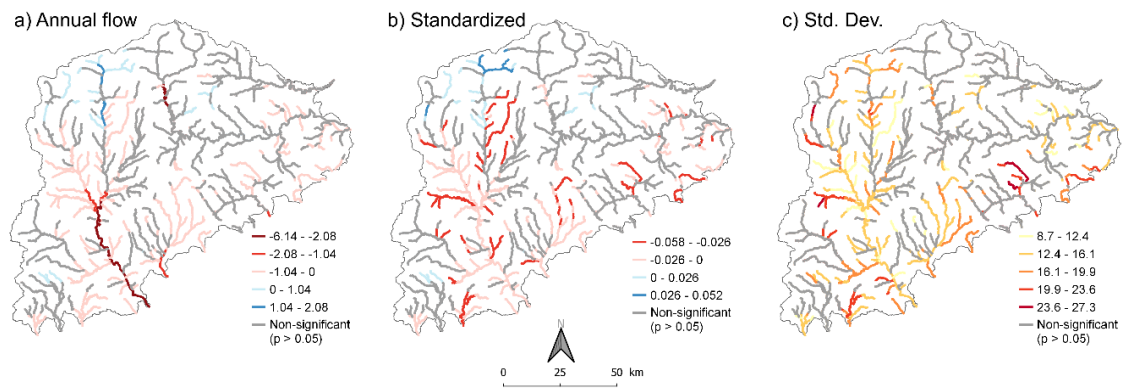

**Figure 4: Spatial distribution of Sen's slope (a, units hm<sup>3</sup>/year), standardized Sen's slope (b) and standard deviation (c) for the hydrological indicator total annual flow.**

Several causes are cited for interpreting flow trends: precipitation, rising temperatures (which should lead to an increase in evapotranspiration) and changes in land use.

Be careful, however, as the evolution of these causes in relation to flow changes is not quantified: 1.392-393 the authors mention an absence of trend in annual rainfall, which is not quantified by a test. In addition, there may be trends in rainfall at other time steps and key periods in the year that influence river intermittency.

Response: Thank you for pointing this out. We agree that we should evaluate and quantify the trends in annual rainfall (as well as temperature) instead of only visually interpreting them, so we have added Table 5 with the quantification and significance of these trends. We have also tested the correlation mentioned between annual % of dry river segments and annual precipitation.

Lines 285-288:

“Figure 3 shows the evolution of the percentage of river segments that dry at least once a year for the period 2001-2022. We observe a drying tendency in the CRBD, which can be positively correlated to an increase in mean annual temperature (Table 5). However, while individual annual percentages negatively correlate with mean annual rainfall (Pearson's  $r = -0.52$ ,  $p < 0.05$ ), there is no significant decreasing trend in the latter (Table 5).”

Table 5:

**Table 5. Analysis of trends for the annual percentage of dry river segments, mean annual temperature and mean annual precipitation. Significant trends are marked in bold (p-value < 0.05). LR: Linear Regression; MK: Mann-Kendall.**

|                                  | LR slope | LR p-value     | R <sup>2</sup> | Sen's slope | MK p-value     |
|----------------------------------|----------|----------------|----------------|-------------|----------------|
| Percentage of dry river segments | 0.40     | <b>6.4E-03</b> | 0.32           | 0.44        | <b>1.9E-10</b> |
| Mean annual temperature          | 0.05     | <b>2.5E-03</b> | 0.37           | 0.04        | <b>2.6E-09</b> |
| Annual precipitation             | -0.68    | 0.90           | 8.4E-04        | -2.50       | 0.06           |

1.407-410: this summary is very probably true, but the article does not deal with forecasting future flows.

Response: We have rewritten this sentence to be more consistent with the scope of this article.

Lines 442-444:

“To sum up, the reduction in streamflow observed during the last twenty years in this study allows us to infer that this tendency will continue in the following decades due to the combined effects of climate change, land use change, and rising anthropogenic demands, thus reinforcing the need for sustainable water resources management.”

In **conclusion**, it seems to me that the objectives of the article should be reformulated to focus on the 3rd objective. The other two are, in my opinion, features of the methodology and should be presented and discussed as such.

Response: Following the reviewer's comments, we have addressed the issue of the formulation of the article's objectives. Thank you very much for your insightful feedback which has allowed us to improve this manuscript.
